# Supplementary material
Source: publisher site journal article supplement (https://www.spandidos-publications.com/7681/downloadSupplementary)
Supplement: Supplementary file 1 [file downloadSupplementary]

## Sheet: Sheet1
Table SI. Differential metabolites between the CP group and the HC group.
Metabolite name	Log2FC	VIP	P-value
Phenylacetic acid + 2O, O-Hex	-3.9667	1.86541	9.45×10-6
Dicaffeoyl quinic acid	-2.64567	1.98277	1.09×10-6
Sulfooxyjasmonate	-2.36861	2.14649	1.60×10-8
Benzoic acid + 2O, O-Hex	-2.15066	1.93409	4.08×10-6
FA 18:2+4O	-1.09998	1.77346	1.84×10-5
Hydroxysuberic acid	-1.06698	1.74761	1.09×10-5
Menisperine	-4.57587	2.32942	1.29×10-9
Jacobine	-4.43687	2.00402	1.06×10-6
Reserpic acid	-3.08178	1.74451	3.33×10-5
Matrine	-2.14498	1.69481	5.12×10-5
Sinomenine	-1.66762	2.30377	8.73×10-10
Orthanilic acid	-4.25531	1.99625	1.24×10-6
Tramadol N-Oxide	-6.49076	2.08799	2.31×10-7
Capsaicin	-6.35763	1.71792	5.58×10-5
3-Methoxysalicyl alcohol	-5.74101	2.10116	3.63×10-8
Phyllalbine	-5.40529	2.0317	5.02×10-7
Bentazone	-4.57443	1.62997	1.91×10-4
Dobesilic acid	-3.51214	2.3236	3.43×10-9
5-(aminosulfonyl)-N-((1-ethyl-1-oxido-2-pyrrolidinyl)methyl)-2-methoxy-Benzamide	-3.46517	2.00864	9.02×10-7
Convolidine	-3.35004	2.12015	9.24×10-8
Fenoxycarb	-3.31323	2.42156	3.75×10-11
m-Ethyl_toluene	-3.29726	1.94516	2.02×10-6
N-Benzylpiperazine	-3.00901	2.07967	6.25×10-8
(S)-(4-Hydroxy-phenyl)-(S)-piperidin-2-yl-acetic acid methyl ester; hydrochloride	-2.93762	2.46538	3.51×10-11
1-Methyl-4-isobutylbenzene	-2.1013	2.05363	2.05×10-7
ethyl 2-(2-methylpropanoylamino)benzoate	-2.04375	2.46505	3.87×10-11
1,2,3,4,Tetrahydro-1,5,7-trimethylnapthalene	-1.92392	2.04827	3.35×10-7
1,2-Dihydronaphthalene	-1.83764	2.14457	6.62×10-8
2-Phenethylmalonic Acid	-1.64644	1.69119	7.65×10-5
Tri-N-octyl trimellitate	-1.60962	1.82885	3.22×10-6
N-(2,4-Dimethylphenyl)formamide	-1.55139	1.85306	2.30×10-6
Dehydro-P-Cymene	-1.545	1.73702	4.68×10-5
Synephrine	-1.43149	1.78549	1.17×10-5
Butyl 4-aminobenzoate	-1.35131	2.29052	5.22×10-10
1-((3-methoxypropyl)amino)-3-methyl-2H-naphtho[1,2,3-de]quinoline-2,7(3H)-dione	-1.18183	1.77942	8.35×10-6
3-Hydroxybenzoate	-1.10906	2.27817	1.17×10-9
4-Anilino-4-oxobutanoic acid	-1.08617	1.80283	2.12×10-5
Diethyltoluamide	-1.07014	1.72652	2.64×10-5
N-(3,4-Dimethoxyphenethyl)-2-(3,4-dimethoxyphenyl)acetamide	-0.885992	1.64933	6.06×10-5
6-oxopristimerol	-0.845716	1.84824	5.10×10-6
o-Dodecylbenzenesulfonic acid	-0.675915	1.61411	9.01×10-5
5-Hydroxyflavone	-3.01092	2.4917	2.11×10-11
(3E,5Z)-1,3,5-Heptatriene	-1.29303	2.14125	3.86×10-8
(+)-Cycloolivil	-3.26335	1.97341	2.43×10-6
Prostaglandin A1	-7.45352	2.16139	4.88×10-8
Norethindrone	-7.28313	2.60447	1.97×10-13
Gibberellin A12 aldehyde	-6.94229	2.5908	3.03×10-13
Arachidonic acid	-6.44784	1.98562	9.62×10-7
5,6-Dihydroxyprostaglandin F1a	-5.87939	2.55971	6.46×10-13
14-(hydroxymethyl)-5,9-dimethyltetracyclo[11.2.1.0??,???.0?,?]hexadecane-5-carbaldehyde	-5.71024	2.01614	6.42×10-7
5-[5-Hydroxy-3-(hydroxymethyl)pentyl]-8a-(hydroxymethyl)-5,6-dimethyl-3,4,4a,6,7,8-hexahydronaphthalene-1-carboxylic acid	-5.666	1.98028	1.04×10-6
Isotretinoin	-5.57196	1.9611	1.44×10-6
Isoprostane F2a-I	-5.55298	1.91634	2.53×10-6
Nerolidol	-5.49793	1.88152	5.06×10-6
Yucalexin B5	-5.48527	2.56773	6.11×10-13
2-Butene-1,4-diol, 2-[2-[(1S,8aR)-1,4,4a,5,6,7,8,8a-octahydro-2-(hydroxymethyl)-5,5,8a-trimethyl-1-naphthalenyl]ethyl]-, (2Z)-	-5.47418	2.08828	1.51×10-7
Nona-3,5-dienoylcarnitine	-5.391	2.3893	2.89×10-10
[(2Z)-6-hydroxy-2,6-dimethylocta-2,7-dienyl] 2-(5-ethenyl-5-methyloxolan-2-yl)propanoate	-5.33944	2.00565	6.46×10-7
1-Naphthalenepentanoic acid, 4-(acetyloxy)-3,4,4a,5,6,7,8,8a-octahydro-β,2,5,5,8a-pentamethyl-3-oxo-, (4S,8aS)-	-5.26863	1.61302	1.99×10-4
Diosgenin	-5.08589	2.11528	5.70×10-8
16,17-Dihydroxykauran-18-oic acid	-4.9555	1.93115	2.23×10-6
Methyltestosterone	-4.91361	2.15113	6.21×10-8
20-Hydroxy-5,8,11,14-eicosatetraenoic acid	-4.86424	1.88182	5.18×10-6
Retinol	-4.25567	1.97589	8.11×10-7
Prostaglandin E2	-4.19216	2.57258	2.42×10-13
Hetisine	-4.12893	1.9439	2.50×10-6
3,4-Dimethyl-5-pentyl-2-furannonanoic acid	-4.09707	1.91216	2.88×10-6
5α-Pregnan-3β,20β-diol 20-sulfate	-4.05223	1.74998	8.64×10-6
(5Z,8R,9S,11R,13E,15S,19R)-9,11,15,19-Tetrahydroxy-5,13-prostadienoic acid	-4.02131	2.05103	4.23×10-7
10,11-dihydro-20-dihydroxy-LTB4	-3.8825	2.14371	5.88×10-8
CID 20054931	-3.8135	1.97541	9.92×10-7
Isonerylgeraniol-18-oic acid	-3.80689	2.08785	1.36×10-7
Bishomostearidonic acid	-3.79858	2.02103	4.70×10-7
Thromboxane A2	-3.77379	2.25293	6.50×10-9
Zaluzanin D	-3.74288	1.85353	8.91×10-6
Lagochilin	-3.73122	2.24646	5.10×10-9
7-[(2R,3S,4S)-4,6-dihydroxy-2-[(E,3S)-3-hydroxyoct-1-enyl]oxan-3-yl]heptanoic acid	-3.71765	2.41499	8.51×10-11
Glutarylcarnitine	-3.68662	2.53714	2.02×10-12
(Z)-7-[(1R,2R,3R,5S)-2-(1,2-Dihydroxy-3-oxooctyl)-3,5-dihydroxycyclopentyl]hept-5-enoic acid	-3.64816	2.41371	2.28×10-10
2-Oxopopulifolic Acid	-3.59407	2.25185	3.65×10-9
(E)-5-(1,2,4a,5-Tetramethyl-7-oxo-3,4,8,8a-tetrahydro-2H-naphthalen-1-yl)-3-methylpent-2-enoic acid	-3.55299	2.33563	3.99×10-10
5-(4-carboxy-3-methylbutyl)-5,6,8a-trimethyl-3-oxo-4a,6,7,8-tetrahydro-4H-naphthalene-1-carboxylic acid	-3.51129	2.54265	6.12×10-13
2-[(1E,3E,5E)-3,7-Dimethylnona-1,3,5,8-tetraenyl]-1,3,3-trimethylcyclohexene	-3.40265	1.84985	7.37×10-6
Testosterone	-3.31433	2.03857	5.00×10-7
Dihomo-γ-linolenic acid	-3.25958	1.86801	5.57×10-6
(2R,4aR,7S,8S,8aR)-8-[(Z)-5-hydroxy-3-methylpent-3-enyl]-4,4,7,8a-tetramethyl-2,3,4a,5,6,8-hexahydro-1H-naphthalene-2,7-diol	-3.13781	2.20918	1.30×10-8
11(13)-Dehydroivaxillin	-3.12317	1.97811	1.74×10-6
11-Dehydro-thromboxane B2	-3.08354	2.55187	2.51×10-12
(S)-10,16-Dihydroxyhexadecanoic acid	-2.93709	2.19058	9.81×10-9
Abscisic acid	-2.90196	1.93016	3.52×10-6
(E)-2-(hydroxymethyl)-3-(3-oxo-5-propan-2-yl-4,5,6,7-tetrahydro-1H-2-benzofuran-4-yl)prop-2-enoic acid	-2.89351	2.50848	6.55×10-12
5-[(8aS)-2,5,5,8a-tetramethyl-3-oxo-4a,6,7,8-tetrahydro-4H-naphthalen-1-yl]-3-methylpentanoic acid	-2.8266	1.77598	1.74×10-5
15-Deacetylneosolaniol	-2.79913	2.3953	1.89×10-10
Hexadecanedioic acid mono-L-carnitine ester	-2.59388	2.04976	2.86×10-7
9-(2,3-dihydroxypropoxy)-9-oxononanoic acid	-2.57587	1.71143	5.89×10-5
Aleuretic Acid	-2.51333	2.33613	3.04×10-10
(9Z)-Pentadec-9-enoylcarnitine	-2.51106	1.67974	9.23×10-5
Thermozymocidin	-2.4396	1.7499	4.25×10-5
cis-Dihydrocarvone	-2.36029	1.97115	1.13×10-7
3-Methylazelaic acid	-2.31675	2.35294	9.56×10-11
5-(4-Acetyloxy-3-hydroxy-2,5,5,8a-tetramethyl-3,4,4a,6,7,8-hexahydronaphthalen-1-yl)-3-methylpentanoic acid	-2.28076	1.94451	5.54×10-7
Secobryononic acid	-2.25029	1.84847	2.48×10-6
Corosin	-2.22683	1.93344	6.53×10-7
[(1S,2R,7R,9R,11R,12S)-2-(hydroxymethyl)-1,5-dimethylspiro[8-oxatricyclo[7.2.1.02,7]dodec-5-ene-12,2'-oxirane]-11-yl] (2Z,4E,6S,7S)-6,7-dihydroxyocta-2,4-dienoate	-2.10346	1.82328	9.35×10-6
Glycyrrhetinic acid	-2.08839	1.64182	4.12×10-5
Nivalenol	-2.0497	2.34371	5.94×10-10
Alisol B Acetate	-2.01402	1.82565	5.27×10-6
Phytosphingosine acetamide	-1.93314	1.77083	4.96×10-5
6-Keto-decanoylcarnitine	-1.92382	2.68052	2.67×10-14
poricoic acid B	-1.91476	2.23814	3.74×10-9
7-Hydroxy-4-[(3Z)-5-hydroxy-3-methyl-3-penten-1-yl]-4a,8,8-trimethyl-3-methylenedecahydro-2-naphthalenyl β-D-mannopyranoside	-1.87825	2.12276	1.13×10-7
Gymnemagenin	-1.87379	1.94303	7.80×10-7
xi-7-Hydroxyhexadecanedioic acid	-1.8657	1.77745	4.72×10-6
Pinthunamide	-1.86471	2.1587	6.36×10-8
Tricaproin	-1.86252	2.47975	9.87×10-12
(5Z,8S,9E,11Z,14Z)-8-Hydroxyicosa-5,9,11,14-tetraenoylcarnitine	-1.84312	1.87887	1.05×10-5
Menthol-glucoronide	-1.83397	2.36814	1.49×10-10
Colforsin	-1.82873	2.16473	4.68×10-8
Alloisolithocholic acid	-1.82836	2.02044	1.79×10-7
Makisteron A	-1.78929	1.77595	1.68×10-5
Ginsenoside F1	-1.78453	2.01073	2.76×10-7
2,3-Dinor-TXB2	-1.76716	2.08002	2.75×10-7
Brassinolide	-1.76343	2.08327	9.93×10-8
ent-1(10)-Halimene-15,19-dioic acid	-1.75848	1.8228	3.11×10-6
3-Methylnonanedioylcarnitine	-1.71471	1.67842	5.48×10-5
NCGC00385237-01_C30H48O4_	-1.71131	1.78186	1.04×10-5
4-[3-methyl-5-(5,6,7-trihydroxy-1,2,4a,5-tetramethyl-3,4,6,7,8,8a-hexahydro-2H-naphthalen-1-yl)pentoxy]-4-oxobutanoic acid	-1.70794	2.10638	1.68×10-7
27-Norcholestanehexol	-1.67339	1.77329	2.61×10-5
Asebotoxin	-1.64609	2.21076	2.48×10-8
Ginsenoside Rk2	-1.58013	1.98876	2.31×10-7
(ent-6α,7α,16αH)-6,7,17-Trihydroxy-19-kauranoic acid	-1.55624	1.8825	1.36×10-6
12,13-DiHODE	-1.54396	2.21974	8.08×10-9
13,14-Dihydro- lipoxin A4	-1.53568	1.97419	2.54×10-7
3b,4b,7a,12a-Tetrahydroxy-5b-cholanoic acid	-1.51207	1.97126	1.14×10-6
(2β,3β,9ε,17ε,22R)-2,3,14,20,22-Pentahydroxyergost-7-en-6-one	-1.47272	1.91478	3.76×10-6
Neriifolin	-1.47251	1.80524	1.16×10-5
4,4,8,10,14-Pentamethyl-17-(4,5,6-trihydroxy-6-methylheptan-2-yl)-2,5,6,7,9,15-hexahydro-1H-cyclopenta[a]phenanthrene-3,16-dione	-1.43812	1.85333	5.60×10-6
13,14-Dihydro PGF2a	-1.42091	2.34778	3.89×10-10
20-Hydroxy-PGF2a	-1.39905	2.05955	3.93×10-7
Ginsenoside Rh2	-1.38813	1.7418	1.38×10-5
(6R,8Z)-6-Hydroxy-3-oxotetradecenoic acid	-1.37713	1.78146	5.07×10-6
9,10-DiHODE	-1.37031	1.73899	8.19×10-5
Polyporusterone D	-1.36614	1.74985	1.50×10-5
Ceanothic acid	-1.34382	1.70978	2.35×10-5
P-Menthane-1,2,8,9-Tetrol	-1.324	1.94917	5.55×10-7
2-Ethylsuberic acid	-1.27759	2.09943	8.71×10-8
15,16-DiHODE	-1.26157	1.85442	4.34×10-6
7-Oxodehydroepiandrosterone 3-acetate	-1.25382	1.81021	4.96×10-6
6,10,14-Trimethyl-5,9,13-pentadecatrien-2-one	-1.19645	1.72328	1.66×10-5
Linalyl acetate	-1.1795	1.83471	5.45×10-6
13,17,24,25-Tetrahydroxy-16,23-epoxydammaran-3-one	-1.16978	1.75273	1.65×10-5
19-hydroxyprostaglandin H2(1-)	-1.09766	1.76138	1.60×10-5
3-Methylpimelic acid	-1.08348	2.28814	1.59×10-9
Colnelenic acid	-1.0729	2.08459	1.06×10-7
Oct-5-enedioylcarnitine	-1.05216	1.61797	2.19×10-4
ethyl 4-((1S,2S,11S,16S,5R,7R,10R,14R,15R)-5,16-dihydroxy-2,15-dimethyltetracy clo[8.7.0.0<2,7>.0<11,15>]heptadec-14-yl)pentanoate	-1.04706	1.90844	3.19×10-6
9-HOTrE	-1.03186	1.58623	1.09×10-4
(10E,13E)-Nonadeca-10,13-Dienoylcarnitine	-1.02859	1.73772	1.17×10-5
10,20-Dihydroxyeicosanoic acid	-0.980672	1.73244	7.06×10-6
Bexarotene	-0.968275	1.65347	4.92×10-5
17-Hydroxyandrostane-3-glucuronide	-0.90756	1.70896	3.40×10-5
Triptophenolide	-0.897884	2.00804	4.45×10-7
3-(1-Hydroxymethyl-1-propenyl)pentanedioic acid	-0.871915	1.81934	9.27×10-6
Cadabicilone	-0.871455	1.67551	2.38×10-5
Eicosanedioic acid	-0.792759	1.64533	3.12×10-5
Monoketocholic acid	-0.79088	1.5937	2.22×10-4
Walleminone	-0.735637	1.79813	9.97×10-6
5-[5-(acetyloxymethyl)-1,2,4a-trimethyl-7-oxo-3,4,8,8a-tetrahydro-2H-naphthalen-1-yl]-3-methylpentanoic acid	-0.664527	1.59728	1.01×10-4
Maltitol	1.22828	1.71487	2.05×10-5
Pregnenolone sulfate	2.41841	1.77585	7.21×10-6
PC(O-18:1/18:0)	2.46671	2.11414	8.49×10-8
Chenodeoxycholic acid sulfate	3.85111	1.75153	1.20×10-5
PC(16:0/18:2)	4.21531	2.53157	8.31×10-12
β-Amyrin	4.48621	1.58845	1.53×10-4
2'-O-Methylinosine	-2.40611	2.30316	2.53×10-9
N6-Isopentenyladenosine	-1.98924	2.11835	3.08×10-8
Arabinosylhypoxanthine	1.43927	1.66592	1.25×10-4
Inosine	1.59716	1.82132	1.98×10-5
Xanthosine	3.25465	2.04369	1.14×10-6
Ophthalmic acid	-5.60156	1.96303	2.12×10-6
1,2,3-Heptadecanetricarboxylic acid	-4.67394	2.2829	2.45×10-9
2-[5-[2-[2-[5-(2-Hydroxypropyl)oxolan-2-yl]propanoyloxy]propyl]oxolan-2-yl]propanoic acid	-3.37526	2.097	2.17×10-7
7-Oxabicyclo(2.2.1)heptane-2,3-dicarboxylic acid, (1R,2S,3R,4S)-rel-	-2.95656	2.02787	1.05×10-7
N-Acetylaspartic acid	-2.58786	2.31204	6.42×10-9
Pipecolic acid	-2.4061	2.1929	1.15×10-8
Histidylproline	-2.25289	2.62242	7.21×10-14
Adipoylglycine	-2.17553	2.45656	7.81×10-12
2-Methyl-4-oxopentanedioic acid	-2.17344	2.39479	2.72×10-10
3-(3-Sulfooxyphenyl)propanoic acid	-1.97312	1.81424	6.03×10-6
3-(1H-Imidazol-4-ylmethyl)-6-(1H-indol-3-ylmethyl)-2,5-piperazinedione	-1.89314	2.19894	2.47×10-8
Peracetic acid	-1.66454	2.00941	7.74×10-7
Sedanonic acid	-1.62981	1.69294	3.45×10-5
γ-Guanidinobutyric acid	-1.59571	1.90498	1.08×10-6
Butyryl-n-trihexylcitrate	-1.55898	1.69716	9.05×10-5
11-Dehydro-2,3-dinor-txb2	-1.42012	2.08546	2.50×10-7
Tropic acid	-1.33362	1.72217	8.60×10-5
Acetaminophen sulfate ester	-1.30745	1.78753	1.53×10-5
2,5-Piperazinedione	-1.22486	1.85188	1.25×10-5
Bestatin	-1.16739	1.70593	1.27×10-5
Threonylphenylalanine	-1.16314	2.11279	1.40×10-8
2-Aminobicyclo[3.1.0]hexane-2,6-dicarboxylic acid	-1.11465	1.69043	1.81×10-5
(E)-5-hydroxy-3-isobutyl-6-(3-methylbenzylidene)-1,6-dihydropyrazin-2(3H)-one	-0.996258	1.61119	5.12×10-5
N-Acetylalanine	-0.899131	1.63212	1.68×10-4
Fructosyl-lysine	-0.847061	1.72839	1.97×10-5
Glycylleucine	1.0837	1.65829	6.47×10-5
Phenylalanylleucine	1.16138	1.74765	5.21×10-5
Isoleucylleucine	1.49241	1.72638	5.13×10-5
Leucylglutamate	1.59718	1.76641	2.55×10-5
Glutamylserine	1.65332	1.6529	8.92×10-5
Leucyl-Isoleucine	1.9312	1.71673	4.89×10-5
Glutaminylleucine	1.97895	1.72708	3.87×10-5
Threonylleucine	2.2879	1.63191	1.02×10-4
Leucylleucine	2.49833	1.67522	9.02×10-5
N6-Acetyl-L-lysine	2.5495	1.65256	9.20×10-5
Leucylasparagine	2.56891	1.59417	1.81×10-4
γ-Glutamylisoleucine	2.92909	1.68214	6.44×10-5
Leucylvaline	4.73848	1.65193	1.00×10-4
(Z)-2-((Z)-1-(hydroxyimino)ethyl)-6,6-dimethylbicyclo[3.1.0]hexan-3-one oxime	-1.77808	1.57342	7.37×10-5
Aloeresin	-10.297	1.84394	9.73×10-6
2,4,7,9-Tetramethyl-5-decyne-4,7-diol	-4.49153	1.88181	4.77×10-6
Sucralose	-3.43673	1.80728	1.46×10-5
6-isopentenyladenine-9-β-D-glucopyranoside	-3.33905	2.58028	2.34×10-12
Verbascose	-2.77925	1.58328	1.63×10-4
4,5-Dicaffeoylquinic acid	-2.55345	2.10781	1.21×10-7
Arabinonic acid	-2.51396	1.94713	3.26×10-6
Rubinaphthin A	-2.41036	1.91569	3.23×10-6
Threonic acid	-2.16029	2.14377	1.80×10-7
3-O-β-D-Galactopyranosyl-L-arabinose	-2.02907	2.33368	4.39×10-10
β-D-Fucose	-1.53026	1.74684	4.44×10-5
2,2,6,6-Tetramethyl-5-hydroxy-4-(α-isopropyl-2,4,6-trihydroxy-3-isobutyrylbenzyl)-4-cyclohexene-1,3-dione	-1.47851	1.73752	1.44×10-5
Neotrehalose	-1.31669	2.14279	1.02×10-7
Maltose	-1.31304	1.86667	6.12×10-6
Sedoheptulose	-1.29323	1.66001	1.91×10-4
Ethylglucuronide	-1.26025	1.73557	3.24×10-5
Fructose lactate	-1.02523	1.92196	2.00×10-6
Primin	-1.01344	1.79578	7.17×10-6
N-[4,5-dihydroxy-6-(hydroxymethyl)-2-(phenylmethoxy)-2H-3,4,5,6-tetrahydropyra n-3-yl]acetamide	2.51193	1.79016	1.00×10-5
1-ethyl-4-(4-methylpiperidyl)-3-nitrohydroquinolin-2-one	-11.7526	1.78582	1.92×10-5
(E)-1-[2-(Hydroxymethyl)pyrrolidin-1-yl]-2-methyldec-8-ene-1,3-dione	-5.68706	2.18662	2.78×10-8
Enrofloxacin	-5.48479	2.14928	2.63×10-8
Nonactinic Acid	-4.08847	2.18961	3.38×10-8
Cafestol	-3.92522	2.35933	1.26×10-9
1,3-Benzodioxole	-3.74313	1.81245	1.86×10-6
3-Hydroxypicolinic acid	-3.71263	1.69302	4.87×10-5
Metomidate	-3.36141	2.19774	1.73×10-8
2-Hydroxypyridine 1-oxide	-3.02235	2.25362	2.35×10-9
4-Quinolinecarboxylic acid, 3-hydroxy-2-methyl-	-3.0086	2.11065	4.59×10-8
6,10a-Dihydroxy-4-(hydroxymethyl)-4,7,11b-trimethyl-1,2,3,4a,5,6,6a,7,11,11a-decahydronaphtho[2,1-][1]benzouran-9-one	-2.99481	2.54789	6.38×10-13
3-adamantanyl-7,9-dimethyl-1-benzyl-5,7,9-trihydro-4H-1,2,4-triazino[4,3-h]pur ine-6,8-dione	-2.89835	1.7351	3.18×10-5
Salsolinol-1-carboxylic acid	-2.82851	2.64132	4.26×10-14
Trimethadione	-2.28503	2.67607	7.99×10-15
Nornicotine	-2.20988	2.29284	1.65×10-9
α-Carboxy-δ-nonalactone	-2.02152	2.55267	3.35×10-13
6-Butyltetrahydro-2H-pyran-2-one	-1.98308	2.53259	6.69×10-13
Befunolol	-1.97243	2.3592	8.37×10-10
3-Ethylfuran	-1.90237	1.91124	1.24×10-6
[(4R,5S,6R,6aS,7R,10aR,11bR)-5-Acetoxy-6-hydroxy-10a-methoxy-4,7,11b-trimethyl-9-oxo-1,2,3,4,4a,5,6,6a,7,9,10a,11,11a,11b-tetradecahydrophenanthro[3,2-b]furan-4-yl]methyl acetate	-1.89909	1.70631	5.33×10-5
Mycophenolic Acid	-1.86613	1.87703	1.72×10-6
Maltoxazine	-1.85098	1.92153	6.28×10-7
Oryzalic acid A	-1.83865	1.9999	4.61×10-7
Benzyladenine	-1.82841	2.46226	7.18×10-12
1,2,3,4-Tetrahydroisoquinoline-3-carboxylic acid	-1.82771	1.94663	1.49×10-6
2,3-Dihydro-5-methyl-1H-pyrrolizine-7-carboxaldehyde	-1.79019	2.25649	1.22×10-9
N-((octahydro-1H-quinolizin-1-yl)methyl)-2,4,5,6-tetrahydrocyclopenta[c]pyrazole-3-carboxamide	-1.62484	2.11593	1.97×10-8
Tetrahydropyridine	-1.60108	2.09208	6.68×10-8
Diethadione	-1.53083	1.77215	7.28×10-6
1,1-Dimethyl-4-phenylpiperazinium	-1.47421	1.89967	1.81×10-6
1,2,3,4-Tetrahydroisoquinoline-1-carboxylic acid	-1.35651	2.30085	1.29×10-9
Pyridoxine	-1.28542	1.58365	2.58×10-4
4-Quinolinecarboxylate	-1.25184	2.02484	7.57×10-8
N-(6-Methoxyquinolin-8-Yl)Alanine	-1.12855	2.146	1.48×10-8
Isopentenyladenine	-1.10443	1.85853	9.51×10-6
2-Hydroxyphenazine	-1.0969	1.58997	1.34×10-4
Kynurenic acid	-0.959689	1.66769	1.53×10-5
6,7-Dimethoxy-1,2,3,4-tetrahydroisoquinoline-3-carboxylic acid	-0.885247	1.63102	3.93×10-5
2-Phenylpyridine	-0.870906	2.08726	5.50×10-8
6-Oxopurine	1.01275	1.62478	1.35×10-4
Furanone A	1.32111	1.67856	4.83×10-5
2-Vinylpyridine	1.43253	1.79249	1.75×10-5
5-(6-methyl-7-oxooctyl)furan-2(5H)-one	1.66241	1.78946	1.75×10-5
Isoindoline	1.77961	1.88361	3.57×10-6
2-Methylpyrrolidine	2.06457	1.62442	9.25×10-5
8-[(2-methylphenyl)methylthio]-9-phenylhydropurin-6-one	5.08743	1.69142	8.10×10-5
Ibuprofen	-4.06348	1.96866	1.34×10-6
7-Diethylamino-4-methylcoumarin	-3.09816	1.91346	4.37×10-6
Senecionine	-3.06373	1.76203	1.82×10-5
Myricetin	-3.05389	1.6756	7.37×10-5
Hymecromone	-3.01685	1.87299	5.34×10-6
Ferulic acid	-2.77324	2.21982	1.46×10-8
Vitexin-2-O-Rhamnoside	-2.54338	1.62533	2.16×10-4
Tamoxifen	-2.32899	1.8569	1.56×10-5
Tricetin	-2.12808	1.85872	1.35×10-6
5,7-dihydroxy-2-(4-hydroxyphenyl)-6,8-bis[3,4,5-trihydroxy-6-(hydroxymethyl)oxan-2-yl]-3,4-dihydro-2H-1-benzopyran-4-one	-2.03164	1.8562	1.88×10-5
Coatlin A	-1.99038	1.86031	4.85×10-6
3,9-Dihydroxypterocarpan	-1.97553	1.58219	6.59×10-5
7-hydroxy-3-phenyl-8-(piperidylmethyl)chromen-4-one	-1.96489	2.41006	9.56×10-11
Corymbosin	-1.54871	1.90653	3.40×10-6
2-(4-Hydroxyphenyl)propionic acid	-1.31933	1.83818	4.34×10-6
(E)-N-(4-acetamidobutyl)-3-(4-hydroxy-3-methoxyphenyl)prop-2-enamide	1.56887	1.9438	1.31×10-6
Bisdemethoxycurcumin	3.99828	1.71418	4.48×10-5
CP, colorectal polyp; FC, fold change; HC, healthy control; VIP, variable influence on projection.
